# Supplementary material
Source: PubMed Central journal article supplement (PMC10068863)
Supplement: EIJ-D-22-00860_Coughlan_SD.pdf [file EIJ-D-22-00860_Coughlan_SD.pdf]

## Supplementary data

### Supplementary Appendix 1

#### Methods.

#### *Angiographic classification system for coronary vessel calcification*

| <b>Coronary vessel calcification grade</b> | <b>Angiographic findings</b>                                                                                                       |
|--------------------------------------------|------------------------------------------------------------------------------------------------------------------------------------|
| None                                       | No radiopacity                                                                                                                     |
| Mild                                       | Faint radiopacities noted during the cardiac cycles                                                                                |
| Moderate                                   | Dense radiopacities noted only during the cardiac cycle                                                                            |
| Severe                                     | Dense radiopacities noted without cardiac motion before contrast injection generally compromising both sides of the arterial lumen |

### Supplementary Appendix 2

#### *List of variables considered by the LASSO model*

Age, body mass index (BMI), sex, diabetes mellitus, hypertension, hypercholesterolaemia, smoking status, acute coronary syndrome (ACS) presentation, multi-vessel disease, previous MI, previous CABG, restenosis morphology (focal or non-focal), left circumflex (LCx) coronary artery, ostial LCx coronary artery, distal vessel, vessel calcification, ostial lesion, bifurcation lesion, chronic total occlusion (CTO) lesion, restenosis severity  $\geq 90\%$ , maximum device diameter (stent or balloon) and short restenosis interval ( $< 6$  months between the initial DES implantation and the initial treatment of the DES-ISR)

**Supplementary Table 1. TRIPOD Checklist: Prediction Model Development and Validation**

| Section/Topic                |     | Checklist Item |                                                                                                                                                                                                       | Page       |
|------------------------------|-----|----------------|-------------------------------------------------------------------------------------------------------------------------------------------------------------------------------------------------------|------------|
| <b>Title and abstract</b>    |     |                |                                                                                                                                                                                                       |            |
| Title                        | 1   | D;V            | Identify the study as developing and/or validating a multivariable prediction model, the target population, and the outcome to be predicted.                                                          | 1          |
| Abstract                     | 2   | D;V            | Provide a summary of objectives, study design, setting, participants, sample size, predictors, outcome, statistical analysis, results, and conclusions.                                               | 2          |
| <b>Introduction</b>          |     |                |                                                                                                                                                                                                       |            |
| Background and objectives    | 3a  | D;V            | Explain the medical context (including whether diagnostic or prognostic) and rationale for developing or validating the multivariable prediction model, including references to existing models.      | 4          |
|                              | 3b  | D;V            | Specify the objectives, including whether the study describes the development or validation of the model or both.                                                                                     | 4          |
| <b>Methods</b>               |     |                |                                                                                                                                                                                                       |            |
| Source of data               | 4a  | D;V            | Describe the study design or source of data (e.g., randomized trial, cohort, or registry data), separately for the development and validation data sets, if applicable.                               | 4,5        |
|                              | 4b  | D;V            | Specify the key study dates, including start of accrual; end of accrual; and, if applicable, end of follow-up.                                                                                        | 4          |
| Participants                 | 5a  | D;V            | Specify key elements of the study setting (e.g., primary care, secondary care, general population) including number and location of centres.                                                          | 4          |
|                              | 5b  | D;V            | Describe eligibility criteria for participants.                                                                                                                                                       | 4          |
|                              | 5c  | D;V            | Give details of treatments received, if relevant.                                                                                                                                                     | 22         |
| Outcome                      | 6a  | D;V            | Clearly define the outcome that is predicted by the prediction model, including how and when assessed.                                                                                                | 5          |
|                              | 6b  | D;V            | Report any actions to blind assessment of the outcome to be predicted.                                                                                                                                | NA         |
| Predictors                   | 7a  | D;V            | Clearly define all predictors used in developing or validating the multivariable prediction model, including how and when they were measured.                                                         | 6, 33      |
|                              | 7b  | D;V            | Report any actions to blind assessment of predictors for the outcome and other predictors.                                                                                                            | 6          |
| Sample size                  | 8   | D;V            | Explain how the study size was arrived at.                                                                                                                                                            | 4          |
| Missing data                 | 9   | D;V            | Describe how missing data were handled (e.g., complete-case analysis, single imputation, multiple imputation) with details of any imputation method.                                                  | 6          |
| Statistical analysis methods | 10a | D              | Describe how predictors were handled in the analyses.                                                                                                                                                 | 5-7        |
|                              | 10b | D              | Specify type of model, all model-building procedures (including any predictor selection), and method for internal validation.                                                                         | 5-7        |
|                              | 10c | V              | For validation, describe how the predictions were calculated.                                                                                                                                         | 5-7        |
|                              | 10d | D;V            | Specify all measures used to assess model performance and, if relevant, to compare multiple models.                                                                                                   | 5-7        |
|                              | 10e | V              | Describe any model updating (e.g., recalibration) arising from the validation, if done.                                                                                                               | 5-7        |
| Risk groups                  | 11  | D;V            | Provide details on how risk groups were created, if done.                                                                                                                                             | 5-7        |
| Development vs. validation   | 12  | V              | For validation, identify any differences from the development data in setting, eligibility criteria, outcome, and predictors.                                                                         | 5-7        |
| <b>Results</b>               |     |                |                                                                                                                                                                                                       |            |
| Participants                 | 13a | D;V            | Describe the flow of participants through the study, including the number of participants with and without the outcome and, if applicable, a summary of the follow-up time. A diagram may be helpful. | 8, 23      |
|                              | 13b | D;V            | Describe the characteristics of the participants (basic demographics, clinical features, available predictors), including the number of participants with missing data for predictors and outcome.    | 8, 20      |
|                              | 13c | V              | For validation, show a comparison with the development data of the distribution of important variables (demographics, predictors and outcome).                                                        | 20, 21, 22 |
| Model development            | 14a | D              | Specify the number of participants and outcome events in each analysis.                                                                                                                               | 23         |
|                              | 14b | D              | If done, report the unadjusted association between each candidate predictor and outcome.                                                                                                              | 8, 24      |
| Model specification          | 15a | D              | Present the full prediction model to allow predictions for individuals (i.e., all regression coefficients, and model intercept or baseline survival at a given time point).                           | 24         |
|                              | 15b | D              | Explain how to use the prediction model.                                                                                                                                                              | 8-10       |
| Model performance            | 16  | D;V            | Report performance measures (with CIs) for the prediction model.                                                                                                                                      | 9          |
| Model-updating               | 17  | V              | If done, report the results from any model updating (i.e., model specification, model performance).                                                                                                   | 9          |
| <b>Discussion</b>            |     |                |                                                                                                                                                                                                       |            |
| Limitations                  | 18  | D;V            | Discuss any limitations of the study (such as nonrepresentative sample, few events per predictor, missing data).                                                                                      | 14         |
| Interpretation               | 19a | V              | For validation, discuss the results with reference to performance in the development data, and any other validation data.                                                                             | 9          |
|                              | 19b | D;V            | Give an overall interpretation of the results, considering objectives, limitations, results from similar studies, and other relevant evidence.                                                        | 12-14      |
| Implications                 | 20  | D;V            | Discuss the potential clinical use of the model and implications for future research.                                                                                                                 | 14         |
| <b>Other information</b>     |     |                |                                                                                                                                                                                                       |            |
| Supplementary information    | 21  | D;V            | Provide information about the availability of supplementary resources, such as study protocol, Web calculator, and data sets.                                                                         | 15         |
| Funding                      | 22  | D;V            | Give the source of funding and the role of the funders for the present study.                                                                                                                         | 15         |

**Supplementary Table 2. Indication for repeat PCI for recurrent DES-ISR through to 1 year and 5 years follow up\***

| <b>Indication for Repeat PCI for recurrent DES-ISR</b> | <b>All Patients (N=341)</b> | <b>Training Population (N=250)</b> | <b>Validation Population (N=91)</b> | <b>p value</b> |
|--------------------------------------------------------|-----------------------------|------------------------------------|-------------------------------------|----------------|
| <b>Through to 1-year follow-up</b>                     |                             |                                    |                                     | 0.27           |
| <i>STEMI</i>                                           | 4 (1.2%)                    | 2 (0.8%)                           | 2 (2.2%)                            |                |
| <i>NSTEMI</i>                                          | 43 (12.6%)                  | 27 (10.8%)                         | 16 (17.6%)                          |                |
| <i>Unstable Angina</i>                                 | 44 (12.9%)                  | 35 (14.0%)                         | 9 (9.9%)                            |                |
| <i>Stable Angina</i>                                   | 232 (68.0%)                 | 174 (69.6%)                        | 58 (63.7%)                          |                |
| <i>Positive Ischemia Stress Testing</i>                | 18 (5.3%)                   | 12 (4.8%)                          | 6 (6.6%)                            |                |
| <b>Indication for Repeat PCI for recurrent DES-ISR</b> |                             |                                    |                                     | <b>p value</b> |
| <b>From 1- to 5-year follow-up</b>                     |                             |                                    |                                     | 0.35           |
| <i>STEMI</i>                                           | 4 (2.3%)                    | 4 (3.1%)                           | 0 (0.0%)                            |                |
| <i>NSTEMI</i>                                          | 19 (10.7%)                  | 12 (9.3%)                          | 7 (14.3%)                           |                |
| <i>Unstable Angina</i>                                 | 34 (19.1%)                  | 26 (20.2%)                         | 8 (16.3%)                           |                |
| <i>Stable Angina</i>                                   | 111 (62.4%)                 | 78 (60.5%)                         | 33 (67.3%)                          |                |
| <i>Positive Ischemia Stress Testing</i>                | 10 (5.6%)                   | 9 (7.0%)                           | 1 (2.0%)                            |                |

\*Indication for repeat PCI for recurrent DES-ISR is reported at a patient level. Some patients had repeat PCI for recurrent DES-ISR in more than one lesion.

DES = drug-eluting stent, ISR = in-stent restenosis, NSTEMI = non-ST-segment elevation myocardial infarction, PCI = percutaneous coronary intervention, STEMI = ST-segment elevation myocardial infarction

**Supplementary Table 3. Repeat PCI for recurrent DES-ISR from 0 to 1 year and from 1 to 5 years as per ISR interval and morphology**

|                                                              |                                                     | <b>Restenosis Interval</b> |                                       |                                        |                                   |                |
|--------------------------------------------------------------|-----------------------------------------------------|----------------------------|---------------------------------------|----------------------------------------|-----------------------------------|----------------|
|                                                              | <b>All Training Population Lesions</b><br>(N=1,778) | <b>6 months</b><br>(N=284) | <b>6-12 months</b><br>(N=711)         | <b>&gt;12-24 months</b><br>(N=238)     | <b>&gt;24 months</b><br>(N=545)   | <b>P value</b> |
| Repeat PCI for recurrent DES-ISR from 0 to 1 year – no. (%)  | 299 (16.8)                                          | 69 (24.3)                  | 117 (16.5)                            | 45 (18.9)                              | 68 (12.5)                         | <0.001         |
| Repeat PCI for recurrent DES-ISR from 1 to 5 years – no. (%) | 155/1,284 (12.1)                                    | 29/195 (14.9)              | 62/546 (11.4)                         | 12/176 (6.8)                           | 52/367 (14.2)                     | 0.050          |
|                                                              |                                                     | <b>ISR Morphology</b>      |                                       |                                        |                                   |                |
|                                                              | <b>All Training Population Lesions</b><br>(N=1,778) | <b>Focal</b><br>(N=1,163)  | <b>Diffuse intra-stent</b><br>(N=420) | <b>Diffuse proliferative</b><br>(N=40) | <b>Total occlusion</b><br>(N=155) | <b>P value</b> |
| Repeat PCI for recurrent DES-ISR from 0 to 1 year – no. (%)  | 299 (16.8)                                          | 165 (14.2)                 | 90 (21.4)                             | 11 (27.5)                              | 33 (21.3)                         | 0.001          |
| Repeat PCI for recurrent DES-ISR from 1 to 5 years – no. (%) | 155/1,284 (12.1)                                    | 108/886 (12.2)             | 37/279 (13.3)                         | 1/22 (4.6)                             | 9/97 (9.3)                        | 0.475          |

**Supplementary Table 4. Results of logistic regression analysis for repeat PCI for recurrent DES-ISR from 1 to 5 years after first reintervention for DES-ISR.**

| <b>Variable</b>                 | <b>Regression coefficient</b> | <b>p value</b> |
|---------------------------------|-------------------------------|----------------|
| Age                             | -0.018                        | 0.060          |
| Diabetes                        | 0.195                         | 0.376          |
| Hypertension                    | 0.822                         | 0.809          |
| Hypercholesterolemia            | 0.256                         | 0.308          |
| Acute coronary syndrome         | -0.056                        | 0.801          |
| Multivessel disease             | 0.258                         | 0.512          |
| Previous myocardial infarction  | 0.033                         | 0.873          |
| Left circumflex coronary artery | 0.004                         | 0.984          |
| Chronic total occlusion         | -0.111                        | 0.774          |
| Vessel calcification            | 0.336                         | 0.143          |
| Bifurcation lesion              | 0.273                         | 0.136          |
| Restenosis interval <6 months   | 0.263                         | 0.322          |

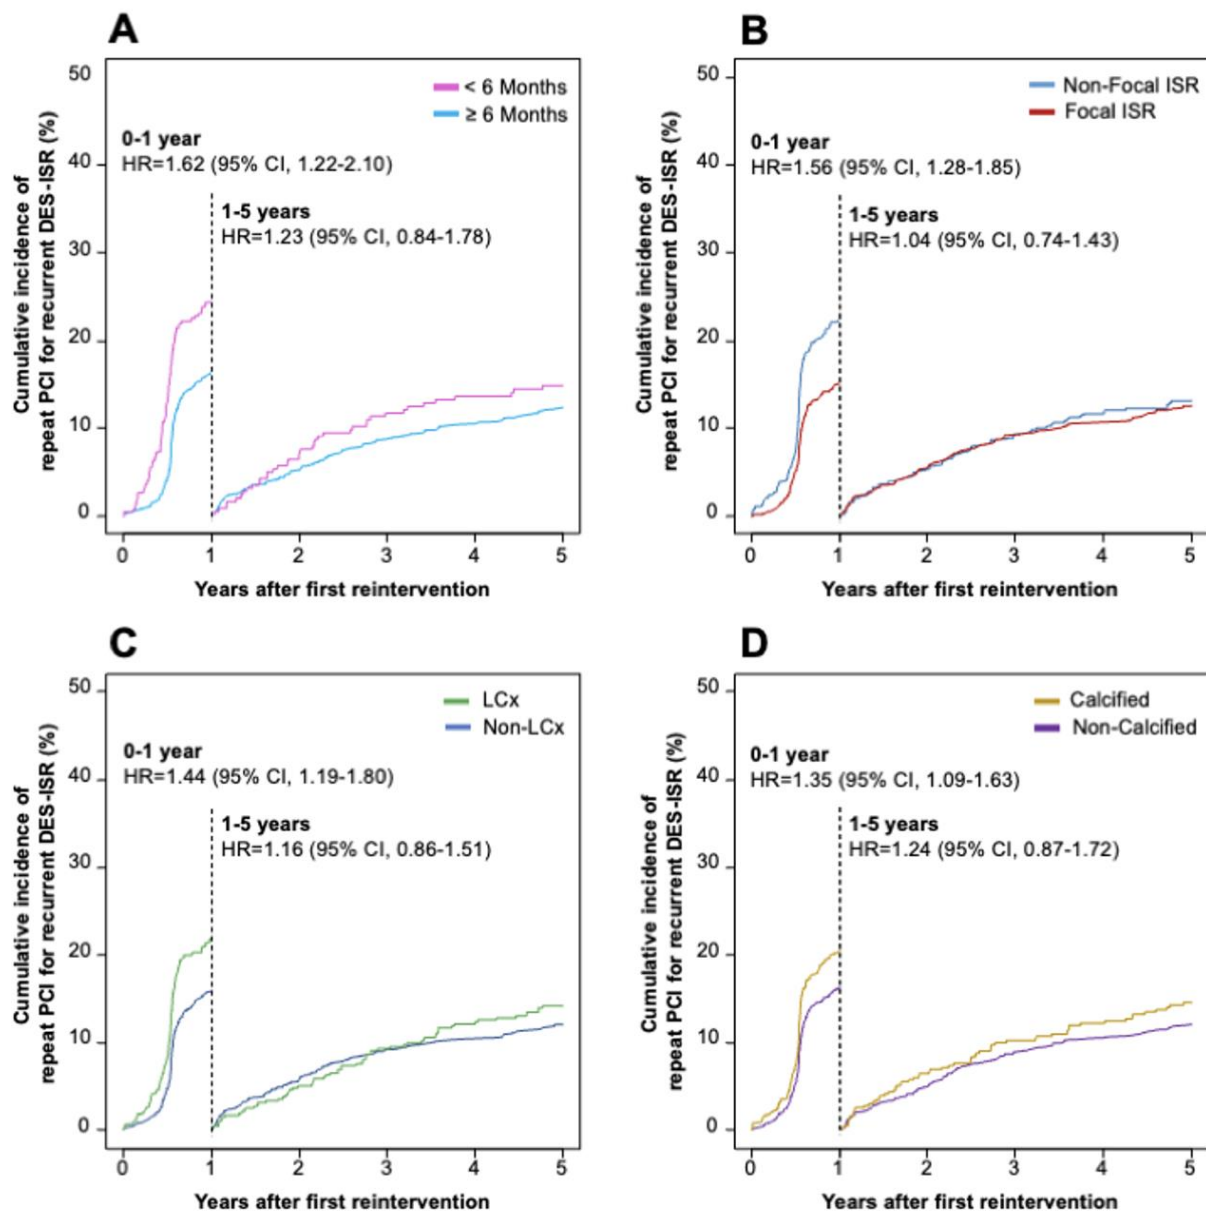

**Supplementary Figure 1.** Landmark analysis demonstrating the cumulative incidence of repeat PCI for recurrent DES-ISR from 0 to 1 year and from 1 to 5 years for lesions with and without the four predictor variables identified in the logistic regression model.

(Panel A) Restenosis interval <6 months versus restenosis interval  $\geq$ 6 months, (Panel B) Restenosis morphology: non-focal versus restenosis morphology: focal (Panel C) Artery involved: left circumflex artery versus non-left circumflex artery, (Panel D) Vessel calcification: calcified vessel versus non-calcified vessel.
